# Supplementary material
Source: PubMed Central journal article supplement (PMC7572106)
Supplement: mmc1.pdf [file mmc1.pdf]

# THE LANCET

## Global Health

### Supplementary appendix

This appendix formed part of the original submission. We post it as supplied by the authors.

Supplement to: Rakotosamimanana N, Randrianirina F, Rendremanana R, et al. GeneXpert for the diagnosis of COVID-19 in LMICs. *Lancet Glob Health* 2020; published online Oct 19. [http://dx.doi.org/10.1016/S2214-109X\(20\)30428-9](http://dx.doi.org/10.1016/S2214-109X(20)30428-9).

**Appendix. Interpretation guide for user of the Xpert Xpress SARS-CoV-2 assay.** A result for a gene is considered negative (NEG) if no amplification is observed (Cycle threshold (Ct)=0) or if the Ct values is greater than 40 cycles. A result for a gene is considered positive (POS), if a Ct value is observed within the normal range (i.e  $Ct \leq 40$  cycles). SPC= Sample Processing Control.

| <b>Gene E</b> | <b>Gene N</b> | <b>SPC</b> | <b>Result</b>                            | <b>Action</b>                                                                                                       |
|---------------|---------------|------------|------------------------------------------|---------------------------------------------------------------------------------------------------------------------|
| NEG           | NEG           | NEG        | <b>Invalid</b>                           | <b>Repeat test.</b><br>If the repeat result remains invalid consider collecting a new specimen.                     |
| NEG           | NEG           | POS        | <b>SARS-COV-2 Not detected</b>           | <b>Report result to healthn care provider.</b><br>Consider testing for other viruses.                               |
| POS           | POS           | POS or NEG | <b>SARS-CoV-2 detected</b>               | <b>Report results to healthn care provider and appropriate public health authorities.</b>                           |
| NEG           | POS           | POS or NEG | <b>SARS-CoV-2 detected</b>               |                                                                                                                     |
| POS           | NEG           | POS or NEG | <b>SARS-COV-2 detection inconclusive</b> | <b>Repeat test.</b><br>If the repeat result remains invalid consider collecting a new specimen or use another test. |
